# Supplementary material for: Milk Thistle Oilseed Cake Flour Fractions: A Source of Silymarin and Macronutrients for Gluten-Free Bread
Source: MDPI journal article supplement (doi:10.3390/antiox11102022), 2022-10-13

# Supplementary Material for article: Milk Thistle Oilseed Cake Flour Fractions: A Source of Silymarin and Macronutrients for Gluten-Free Bread

**Jan Bedrníček<sup>1\*</sup>, František Lorenc<sup>1</sup>, Markéta Jarošová<sup>2</sup>, Veronika Bártová<sup>2</sup>, Pavel Smetana<sup>1</sup>, Jaromír Kadlec<sup>1</sup>, Dana Jirotková<sup>1</sup>, Jan Kyselka<sup>3</sup>, Eva Petrašková<sup>4</sup>, Marie Bjelková<sup>5</sup>, Petr Konvalina<sup>6</sup>, Trong Nghia Hoang<sup>6</sup> and Jan Bárta<sup>2</sup>**

<sup>1</sup>Department of Food Biotechnologies and Agricultural Products' Quality, Faculty Agriculture and Technology, University of South Bohemia in České Budějovice, Studentská 1668, 370 05 České Budějovice, Czech Republic

<sup>2</sup>Department of Plant Production, Faculty Agriculture and Technology, University of South Bohemia in České Budějovice, Na Sádkách 1780, 370 05 České Budějovice, Czech Republic

<sup>3</sup>Department of Dairy, Fat and Cosmetics, University of Chemistry and Technology Prague, Technická 5, 166 28 Prague 6 – Dejvice, Czech Republic

<sup>4</sup>Department of Animal Husbandry Sciences, Faculty Agriculture and Technology, University of South Bohemia in České Budějovice, Studentská 1668, 370 05 České Budějovice, Czech Republic

<sup>5</sup>Department of Legumes and Technical Crops, Agritec Plant Research, Ltd. Zemědělská 2520, 787 01 Šumperk, Czech Republic

<sup>6</sup>Department of Agroecosystems, Faculty Agriculture and Technology, University of South Bohemia in České Budějovice, Branišovská 1645, 370 05 České Budějovice, Czech Republic

\*Corresponding author's email address: bedrnicek@fzt.jcu.cz, tel.: + 420 389 032 612

**Table S1.** Recipe of control bread and breads fortified with different fractions of milk thistle oilseed cake flour.

| <b>Ingredient</b>                         | <b>Amount of ingredients (%)</b> |                                                                       |
|-------------------------------------------|----------------------------------|-----------------------------------------------------------------------|
|                                           | <b>Control bread</b>             | <b>Breads with 10 % of milk thistle oilseed cake flour fractions*</b> |
| Sorghum flour                             | 23.20                            | 20.88                                                                 |
| Corn flour                                | 11.60                            | 10.44                                                                 |
| Corn starch                               | 5.80                             | 5.22                                                                  |
| Potato starch                             | 5.80                             | 5.22                                                                  |
| Tapioca starch                            | 5.80                             | 5.22                                                                  |
| Guar flour                                | 0.52                             | 0.47                                                                  |
| Milk thistle oilseed cake flour fractions | 0                                | 5.27                                                                  |
| Sunflower oil                             | 2.32                             | 2.32                                                                  |
| Salt                                      | 0.81                             | 0.81                                                                  |
| Dried yeasts                              | 0.58                             | 0.58                                                                  |
| Water                                     | 43.56                            | 43.56                                                                 |

\*10 % of gluten-free flour blend was replaced by different milk thistle oilseed cake flour fractions: unsieved, coarse, medium and fine fraction.

**Table S2.** Settings of multiple reaction monitoring acquisition mode of mass spectrometer for determination of silymarin complex.

| Compound     | Precursor ion ( <i>m/z</i> ) | Product Ion ( <i>m/z</i> ) | Fragmentor voltage (V) | Collision energy (eV) | Cell accelerator voltage (V) | LOD ( $\mu\text{g/ml}$ ) | LOQ    | Calibration curve linear range (ng/ml) | Calibration curve correlation coefficient ( $R^2$ ) |
|--------------|------------------------------|----------------------------|------------------------|-----------------------|------------------------------|--------------------------|--------|----------------------------------------|-----------------------------------------------------|
| Taxifolin    | 303                          | 285                        | 135                    | 8                     | 4                            | 0.0001                   | 0.0004 | 7.8 – 125.0                            | 0.999                                               |
| Silychristin | 481                          | 325                        | 135                    | 20                    | 4                            | 0.0011                   | 0.0036 | 31.3 – 1000.0                          | 0.993                                               |
| Silydianin   | 481                          | 151                        | 135                    | 20                    | 4                            | 0.0005                   | 0.0017 | 7.8 – 250.0                            | 0.997                                               |
| Silybin A    | 481                          | 301                        | 135                    | 20                    | 4                            | 0.0006                   | 0.0020 | 61.9 – 989.6                           | 0.998                                               |
| Silybin B    | 481                          | 301                        | 135                    | 20                    | 4                            | 0.0010                   | 0.0033 | 252.6 – 1010.4                         | 0.999                                               |
| Isosilybin A | 481                          | 125                        | 135                    | 30                    | 4                            | 0.0014                   | 0.0047 | 20.5 – 657.1                           | 0.998                                               |
| Isosilybin B | 481                          | 125                        | 135                    | 30                    | 4                            | 0.0002                   | 0.0008 | 10.7 – 342.9                           | 0.999                                               |

LOD = limit of detection, LOQ = limit of quantification; LODs and LOQs were calculated according to this formula:  $\text{LOD, LOQ} = x = \frac{k \times \sigma}{S}$ , where *k* is 3 or 10 for LOD or LOQ, respectively,  $\sigma$  is the baseline noise of the blank solution chromatogram and *S* is the slope of the calibration curve.

**Table S3.** Energy profile (%) in control bread and breads with unsieved, coarse, medium and fine milk thistle oilseed cake flour.

| Total energy represented by specific nutrient (%) | Fraction added to bread |                        |                        |                       |                       |
|---------------------------------------------------|-------------------------|------------------------|------------------------|-----------------------|-----------------------|
|                                                   | Control                 | Unsieved               | Coarse                 | Medium                | Fine                  |
| Crude protein                                     | 7.8±0.4 <sup>D</sup>    | 9.5±0.3 <sup>C</sup>   | 9.0±0.3 <sup>C</sup>   | 10.1±0.2 <sup>B</sup> | 12.7±0.2 <sup>A</sup> |
| Crude fat                                         | 15.3±1.0 <sup>D</sup>   | 18.9±0.6 <sup>AB</sup> | 17.9±0.5 <sup>BC</sup> | 17.7±0.1 <sup>C</sup> | 19.8±0.4 <sup>A</sup> |
| Total insoluble fibre                             | 2.4±0.8 <sup>C</sup>    | 4.9±0.4 <sup>AB</sup>  | 5.7±0.2 <sup>A</sup>   | 5.7±0.1 <sup>A</sup>  | 4.1±0.6 <sup>B</sup>  |
| Nitrogen-free extract                             | 74.6±0.5 <sup>A</sup>   | 66.7±0.3 <sup>B</sup>  | 67.4±0.1 <sup>B</sup>  | 66.5±0.3 <sup>B</sup> | 63.4±1.2 <sup>C</sup> |

Results are expressed as means ± standard deviation ( $n = 3$ ); <sup>A-D</sup>Values with different superscripts within a row differ significantly ( $p < 0.05$ ) based on Fisher's LSD test.

**Figure S1.** Pictures of crumb and crust of control gluten-free bread (A) and breads enriched with unsieved (B), coarse (C), medium (D) and fine (E) milk thistle oilseed cake flour fractions.

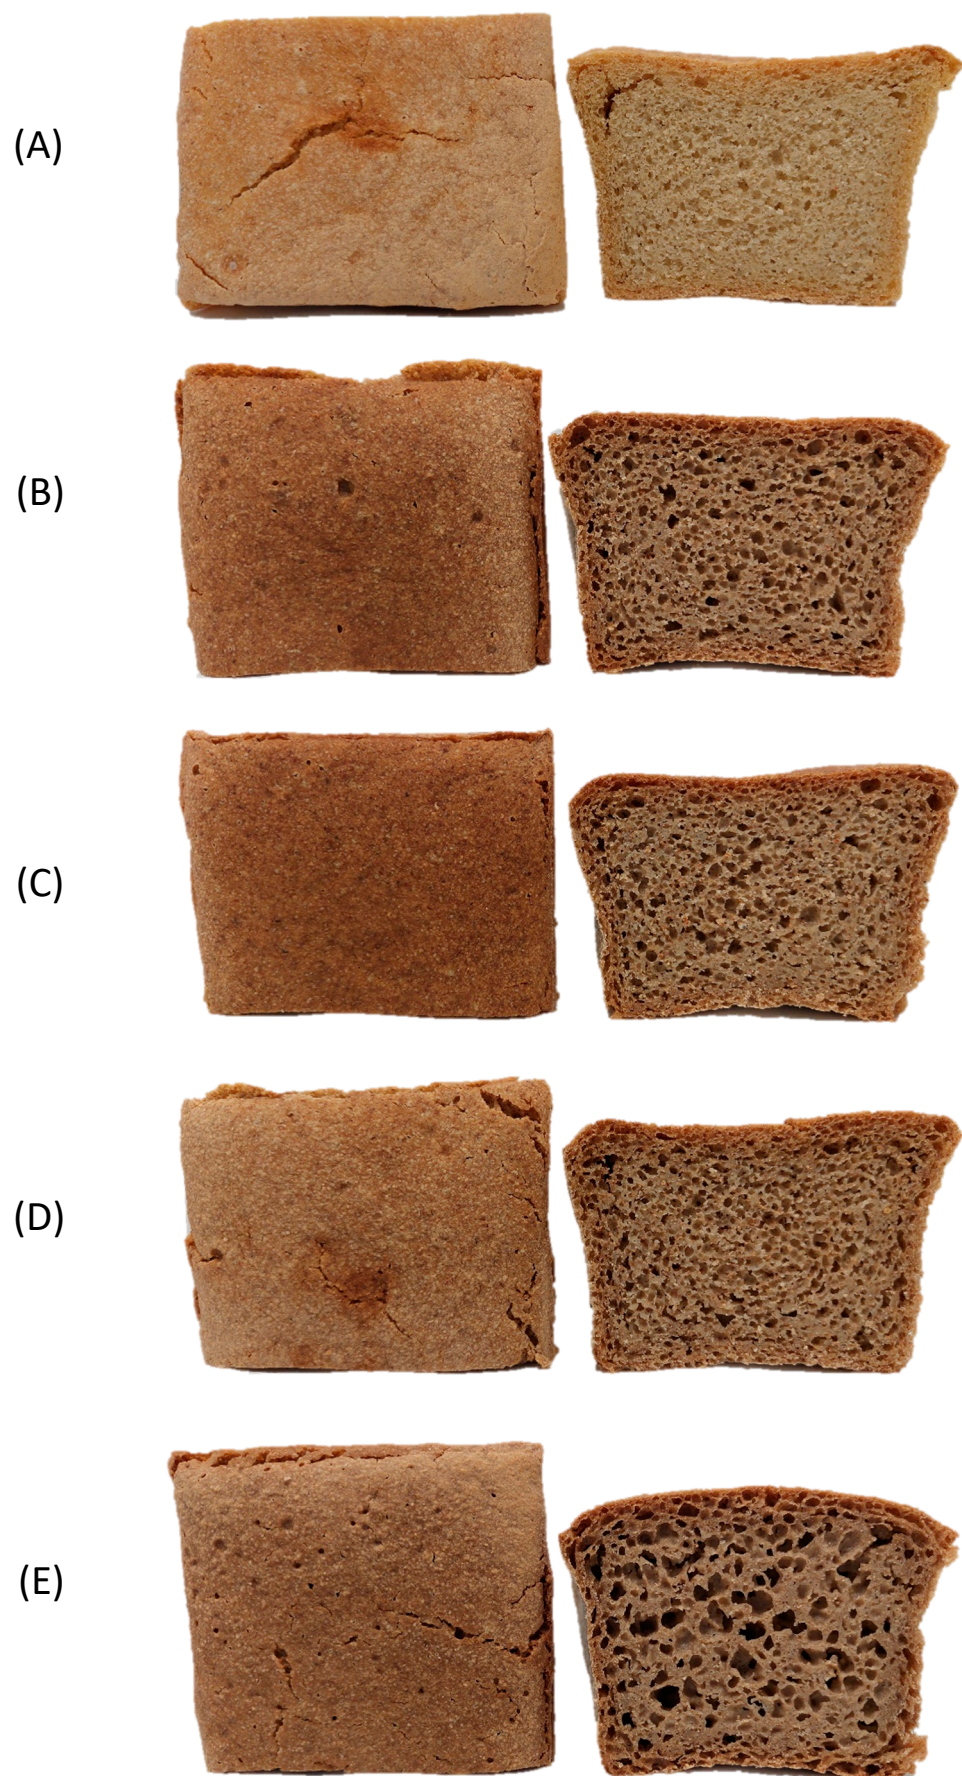

Supplement: s1 [file s1]
